# Supplementary material
Source: HighWire-hosted journal article supplement (https://ijgc.bmj.com/highwire/filestream/18765/field_highwire_adjunct_files/0/ijgc-2020-002044supp001_data_supplement.pdf)
Supplement: ijgc-2020-002044supp001_data_supplement.pdf [file ijgc-2020-002044supp001_data_supplement.pdf]

Supplement table 1. Clinicopathological features for of 60 villoglandular adenocarcinoma patients

| Number | Age | HPV         | FIGO stage | Surgery                   | Adjuvant therapy | DSI>1/2 | LVSI | LN(+) | Follow-up(m) | Outcome |
|--------|-----|-------------|------------|---------------------------|------------------|---------|------|-------|--------------|---------|
| 1      | 48  |             | IB1        | ATH+BS                    |                  | +       |      | ND    | 90.00        | NED     |
| 2      | 52  | 16+         | IB1        | RRT+ PLND                 |                  |         |      |       | 49.23        | NED     |
| 3      | 47  | 16+,56+,66+ | IB1        | ARH+BSO+ PLND             |                  |         |      |       | 117.67       | NED     |
| 4      | 50  | 16+         | IB1        | ARH +BSO+ PLND            |                  |         |      |       | 83.60        | NED     |
| 5      | 52  | 18+         | IIA1       | ARH +BSO+ PLND            | NACT+RT          |         |      |       | 23.60        | NED     |
| 6      | 41  | —           | IB1        | LRH +BSO+PLND             |                  |         |      |       | 13.07        | NED     |
| 7      | 43  | 16+         | IB1        | ARH +BSO+ PLND            |                  |         |      |       | 5.70         | NED     |
| 8      | 40  | 16+         | IB2        | ARH+BS+PLND               | chemo/RT         | +       | +    |       | 56.93        | NED     |
| 9      | 45  | 16+         | IB1        | ARH +BSO+ PLND            |                  |         |      |       | 50.13        | NED     |
| 10     | 30  |             | IIA2       | ARH +BS+ PLND             | chemo/RT         | +       |      | +     | 31.87        | NED     |
| 11     | 36  | 16+         | IB1        | ARH +BSO+ PLND            |                  |         |      |       | 7.17         | NED     |
| 12     | 45  | 16+         | IB1        | ARH +BSO+ PLND            |                  |         |      |       | 5.07         | NED     |
| 13     | 39  | 18+         | IB1        | ARH +BS+PLND              |                  | UN      |      |       | 50.23        | NED     |
| 14     | 49  |             | IB1        | ARH +BSO+ PLND            |                  | UN      |      |       | 42.53        | NED     |
| 15     | 40  | 16+         | IA2        | LTH+BS                    |                  | UN      |      | ND    | 25.33        | NED     |
| 16     | 41  |             | IB1        | ARH +BSO+ PLND            | chemo            |         |      |       | 50.80        | NED     |
| 17     | 41  |             | IB1        | ARH +BSO+ PLND            |                  |         |      |       | 75.33        | NED     |
| 18     | 48  |             | IB1        | ARH +BSO+ PLND            |                  |         |      |       | 84.43        | NED     |
| 19     | 47  |             | IB1        | ARH +BSO+ PLND            | chemo            |         |      |       | 111.97       | NED     |
| 20     | 36  |             | IB1        | LRH+BSO+ PLND             | NAIC+chemo       |         |      |       | -            | Lost    |
| 21     | 33  |             | IB1        | RAH +BS+ PLND             |                  |         |      |       | 152.20       | NED     |
| 22     | 36  |             | IB2        | ARH+BSO+ PLND             |                  | +       |      |       | 154.57       | NED     |
| 23     | 45  |             | IB1        | ARH +BSO+ PLND            |                  |         |      |       | -            | Lost    |
| 24     | 39  |             | IB1        | ARH +BSO+ PLND            | chemo/RT         | +       |      |       | 61.70        | NED     |
| 25     | 36  |             | IB1        | ATH+BS                    | chemo            |         |      | ND    | 56.13        | NED     |
| 26     | 35  |             | IB2        | ARH +BSO+ PLND            |                  |         |      |       | -            | Lost    |
| 27     | 42  |             | IB2        | LRH +BS+ PLND             | NAIC+ chemo      | +       |      |       | 69.03        | NED     |
| 28     | 68  |             | IA2        | LRH +BSO+ PLND            |                  | UN      |      |       | 63.50        | NED     |
| 29     | 45  | —           | IB2        | LRH +BSO+ PLND            | chemo            |         |      |       | 60.17        | NED     |
| 30     | 44  |             | IIA1       | LRH +BS+ PLND             | NACT+chemo       |         |      |       | 38.80        | NED     |
| 31     | 27  |             | IB2        | LRH +BS+ PLND             | NACT+chemo       |         |      |       | 55.57        | NED     |
| 32     | 56  |             | IA2        | LRH +BSO+ PLND            | chemo            |         |      |       | 54.87        | NED     |
| 33     | 42  |             | IIA1       | LRH +BS+ PLND             | chemo            |         |      |       | 13.03        | NED     |
| 34     | 40  |             | IB1        | LRH +BS+ PLND             | chemo            |         |      |       | 44.63        | NED     |
| 35     | 49  |             | IA2        | ATH+ BS+PLND              | NAIC+ chemo      |         |      |       | 109.97       | NED     |
| 36     | 47  |             | IB1        | LRH +BSO+ PLND +<br>PALND |                  |         |      |       | 15.63        | NED     |
| 37     | 28  | 18+         | IB2        | LRH +BSO+ PLND            | chemo/RT         | +       |      |       | -            | Lost    |
| 38     | 43  |             | IB1        | LRH +BSO+ PLND +<br>PALND |                  |         |      |       | 23.33        | NED     |

|    |    |          |      |                           |                   |    |    |        |      |
|----|----|----------|------|---------------------------|-------------------|----|----|--------|------|
| 39 | 32 |          | IB1  | ARH + BS + PLND           |                   | UN |    | 38.80  | NED  |
| 40 | 41 |          | IB1  | ARH + BSO + PLND          | chemo             |    |    | 110.17 | NED  |
| 41 | 36 | 18+      | IB1  | ARH + BSO + PLND          |                   |    |    | -      | Lost |
| 42 | 38 |          | IB2  | ARH + BSO + PLND          | NACT+chemo        |    |    | 83.37  | NED  |
| 43 | 58 | 18+      | IB1  | ARH +BSO+ PLND            |                   |    |    | 57.93  | NED  |
| 44 | 50 | 16+      | IB1  | LRH + BSO + PLND          | chemo/RT          | +  | +  | 33.17  | NED  |
| 45 | 50 |          | IB1  | LRH + BSO + PLND          | chemo/RT          | +  |    | 43.50  | NED  |
| 46 | 42 | 16+      | IB1  | ARH + BSO + PLND          | chemo/RT          | +  | +  | 36.43  | NED  |
| 47 | 38 |          | IB1  | LTH+ BSO                  |                   |    | ND | 85.17  | NED  |
| 48 | 34 |          | IB2  | ARH + BSO + PLND          | NACT+chemo<br>/RT |    |    | 52.83  | NED  |
| 49 | 42 |          | IB1  | ARH + BSO + PLND          |                   |    |    | 35.63  | NED  |
| 50 | 61 |          | IIA1 | LRH + BSO + PLND          |                   |    |    | 34.50  | NED  |
| 51 | 52 | 16+, 18+ | IB1  | ARH + BSO + PLND          |                   | +  |    | 30.83  | NED  |
| 52 | 51 | HC2+     | IB1  | LRH + BSO + PLND          |                   | +  |    | 41.87  | NED  |
| 53 | 38 |          | IB1  | LRH + BSO + PLND          |                   | UN |    | 37.40  | NED  |
| 54 | 53 |          | IIA1 | ARH + BSO + PLND          |                   |    |    | 26.90  | NED  |
| 55 | 50 |          | IB1  | LRH + BSO + PLND          | RT                | +  |    | 25.27  | NED  |
| 56 | 54 |          | IB1  | ARH + BSO + PLND          |                   | +  | +  | 110.40 | NED  |
| 57 | 40 |          | IB2  | ARH +BSO+ PLND            | NACT+chemo        |    |    | 113.93 | NED  |
| 58 | 36 |          | IB1  | ARH +BSO+ PLND +<br>PALND |                   |    | UN | 63.80  | NED  |
| 59 | 64 |          | IB1  | LRH +BSO+ PLND            | chemo/RT          | +  |    | -      | Lost |
| 60 | 42 |          | IB2  | LRH+BSO+ PLND +<br>PALND  | NACT              |    |    | -      | Lost |

HPV, human papillomavirus; ARH, abdominal radical hysterectomy; ATH, abdominal total hysterectomy; BS, bilateral salpingectomy; BSO, bilateral salpingo-oophorectomy; chemo, chemotherapy; DSI, deep space stromal invasion; Lost, lost interview; LRH, laparoscopic radical hysterectomy; LTH, laparoscopic total hysterectomy; LVSI, lymphovascular infiltration; LN, lymph node; NACT, neoadjuvant chemotherapy; NAIC, neoadjuvant arterial interventional chemotherapy; NED, no evidence of recurrence; PALND, paraaortic lymphadenectomy; PLND, Pelvic lymphadenectomy; RRT, radical residual trachelectomy; RT, radiotherapy; ND, no dissection; UN, unknown; HC2, HC2 high-risk HPV DNA Test;

Supplement table 2. Immunohistochemistry of 8 patients with villoglandular adenocarcinoma.

| Patients | P16 | Ki67  | P53  | ER | PR | CK7 | CK20 | Villin | VIM | CEA |
|----------|-----|-------|------|----|----|-----|------|--------|-----|-----|
| 1        |     | 90%+  | -    | ±  | ±  | 3+  | -    | ±      | -   |     |
| 2        | +   | 90%+  |      |    |    |     |      |        |     |     |
| 3        | +   | 80%+  | -    | +  | ±  | +   | -    |        | -   | -   |
| 4        |     | >50%+ | -    | -  | -  | +   |      |        |     | -   |
| 5        | +   | 50%+  |      | ±  | -  |     |      |        | -   | ±   |
| 6        | +   | 20%+  | 20%+ |    |    |     |      |        | -   | +   |
| 7        | +   | 80%+  | -    | ±  |    |     | -    | +      | -   | +   |
| 8        | +   | 60%+  | -    | -  | -  |     |      |        | -   |     |

CK, cytokeratin; ER, estrogen receptor; PR, progesterone receptor; VIM, vimentin;
